# Supplementary material
Source: publisher figshare collection journal article supplement (https://frontiersin.figshare.com/ndownloader/files/18539210)
Supplement: Supplementary file 1 [file 18539210]

# Supplementary Information

## of the paper

### “Improved gas selectivity based on carbon modified SnO<sub>2</sub> nanowires”

Below is the Python code used to obtain improved selectivity from carbon modified SnO<sub>2</sub> nanowires.

#### Dependencies

```
%matplotlib inline
from collections import defaultdict
import matplotlib.pyplot as plt
import pandas as pd
import numpy as np

# ---- Scikit -----
from sklearn import svm
from sklearn.preprocessing import OneHotEncoder, LabelEncoder, StandardScaler
from sklearn.model_selection import StratifiedKFold, train_test_split,
cross_val_score, KFold
from sklearn.metrics import mean_squared_error
# ---- Classifier -----
from sklearn.ensemble import RandomForestClassifier, BaggingClassifier,
AdaBoostClassifier
from sklearn.ensemble import ExtraTreesClassifier
from sklearn.tree import DecisionTreeClassifier
from sklearn.neighbors import KNeighborsClassifier
from sklearn.neural_network import MLPClassifier
# ---- Regressor -----
from sklearn.linear_model import Lasso
from sklearn.ensemble import RandomForestRegressor, BaggingRegressor,
AdaBoostRegressor
from sklearn.ensemble import ExtraTreesRegressor
from sklearn.tree import DecisionTreeRegressor
from sklearn.neighbors import KNeighborsRegressor
from sklearn.neural_network import MLPRegressor

# ---- Keras -----
import keras
from keras.models import Sequential
from keras.layers import Dense, Dropout
from keras.utils import to_categorical
```

```
# ---- PyDrive -----
!pip install -U -q PyDrive
from pydrive.auth import GoogleAuth
from pydrive.drive import GoogleDrive
from google.colab import auth
from oauth2client.client import GoogleCredentials
```

```
# ---- Umap -----
!pip install -U -q umap-learn
import umap
```

```
import warnings
warnings.simplefilter("ignore")

Using TensorFlow backend.
Building wheel for PyDrive (setup.py) ... done
```

### Loading files

```
# Authenticate and create the PyDrive client.
auth.authenticate_user()
gauth = GoogleAuth()
gauth.credentials = GoogleCredentials.get_application_default()
drive = GoogleDrive(gauth)

# Load file
sensor_data_id = '0B7EQzoMtLBSRE96d0k4OFp0X2RfUzc3elZmbTRiU2o2blNB'
drive.CreateFile({'id':sensor_data_id}).GetContentFile('sensor_data.csv')
sensor_data = pd.read_csv('sensor_data.csv', index_col=0)
```

### Data exploration

```
sensor_data

sensor_data.keys()

Index(['T200', 'T250', 'T300', 'T350', 'T400', 'Gas', ' "Color"',
      ' "Concentration"'],
      dtype='object')

sensor_data.rename(columns={
    ' "Concentration"': 'Concentration',
    ' "Color"': 'Color'
}, inplace=True)

sensor_data.info()

<class 'pandas.core.frame.DataFrame'>
Int64Index: 60 entries, 1 to 60
```

```
Data columns (total 8 columns):
T200          60 non-null float64
T250          60 non-null float64
T300          60 non-null float64
T350          60 non-null float64
T400          60 non-null float64
Gas           60 non-null object
Color         60 non-null object
Concentration  60 non-null int64
dtypes: float64(5), int64(1), object(2)
memory usage: 4.2+ KB
```

```
sensor_data[['T200', 'T250', 'T300', 'T350', 'T400']].describe()
```

```
for key in sensor_data['Gas'].unique():
    print(f'{key}: {sensor_data[sensor_data["Gas"] == key].shape[0]} occurrences')

Ethanol: 10 occurrences
Hydrogen: 10 occurrences
CO: 10 occurrences
Acetone: 10 occurrences
Ammonia: 10 occurrences
Toluene: 10 occurrences
```

## Pre-processing

```
label_encoder = LabelEncoder()
X_data = StandardScaler().fit_transform(sensor_data[['T200', 'T250', 'T300',
'T350', 'T400']])
Y_clas = label_encoder.fit_transform(sensor_data['Gas'])
Y_regr = sensor_data['Concentration'].values

X_data[:5]

Y_clas
```

```
array([3, 3, 3, 3, 3, 4, 4, 4, 4, 4, 2, 2, 2, 2, 2, 0, 0, 0, 0, 0, 1, 1,
       1, 1, 1, 5, 5, 5, 5, 5, 3, 3, 3, 3, 3, 4, 4, 4, 4, 4, 2, 2, 2, 2,
       2, 0, 0, 0, 0, 0, 0, 1, 1, 1, 1, 1, 5, 5, 5, 5, 5])
```

## Classification

### Testing multiple models

```
scores = defaultdict(list)

# Stratified k-Fold keeps the proportions of the classes
skf = StratifiedKFold(n_splits=10)
```

```

for train_index, test_index in skf.split(X_data, Y_clas):
    x_train, x_test = X_data[train_index], X_data[test_index]
    y_train, y_test = Y_clas[train_index], Y_clas[test_index]

models = [
    {"name": "Random Forest", "model": RandomForestClassifier(n_estimators=10,
random_state=10)},
    {"name": "SVC\t", "model": svm.LinearSVC(random_state=10)},
    {"name": "Ada Boost", "model": AdaBoostClassifier(random_state=10)},
    {"name": "Bagging (KNN)", "model": BaggingClassifier(KNeighborsClassifier(),
random_state=10)},
    {"name": "Extra trees", "model": ExtraTreesClassifier(n_estimators=10,
random_state=10)},
    {"name": "Decision trees", "model": DecisionTreeClassifier(random_state=10)},
    {"name": "MLP\t", "model": MLPClassifier(random_state=10)},
]

# Models are tested on the split and result is saved
for model in models:
    # Train model
    model['model'].fit(x_train, y_train)

    # Save validation data
    scores[model['name']].append(model['model'].score(x_test, y_test))

for model, score in scores.items():
    print(f'Model: {model} \t Score: {np.mean(score):.2f} (+/-)
{np.std(score):.2f}')

```

## UMAP

```

embedding = umap.UMAP(n_neighbors=5,
                      min_dist=0.3,
                      metric='correlation').fit_transform(X_data)
x = StandardScaler().fit_transform(embedding[:, 0].reshape(-1, 1))
y = embedding[:, 1]

class_color = {
    0: 'b',
    1: 'g',
    2: 'r',
    3: 'c',
    4: 'm',
    5: 'y'
}

c = list(map(lambda i: class_color[i], Y_clas))

```

```

plt.figure(facecolor='w',figsize=(16, 8), dpi=600)
plt.scatter(x, y, c=c)
plt.grid()
plt.savefig('umap');

scores = defaultdict(list)

# Stratified k-Fold keeps the proportions of the classes
skf = StratifiedKFold(n_splits=10)
for train_index, test_index in skf.split(X_data, Y_clas):

    # Embedding
    umap_obj = umap.UMAP(
        n_neighbors=5,
        min_dist=0.3,
        metric='correlation'
    )

    # Separate data
    x_train = umap_obj.fit_transform(X_data[train_index])
    x_test = umap_obj.transform(X_data[test_index])
    y_train, y_test = Y_clas[train_index], Y_clas[test_index]

    # Scale
    scaler = StandardScaler()
    x_train = scaler.fit_transform(x_train)
    x_test = scaler.transform(x_test)

    # Models
    models = [
        {"name":"Random Forest", "model":RandomForestClassifier(n_estimators=10,
random_state=10)},
        {"name":"SVC\t", "model":svm.LinearSVC(random_state=10)},
        {"name":"Ada Boost", "model":AdaBoostClassifier(random_state=10)},
        {"name":"Bagging (KNN)", "model":BaggingClassifier(KNeighborsClassifier(),
random_state=10)},
        {"name":"Extra trees", "model":ExtraTreesClassifier(n_estimators=10,
random_state=10)},
        {"name":"Decision trees", "model":DecisionTreeClassifier(random_state=10)},
        {"name":"MLP\t", "model":MLPClassifier(random_state=10)},
    ]

    # Models are tested on the split and result is saved
    for model in models:
        # Train model
        model['model'].fit(x_train, y_train)

        # Save validation data
        scores[model['name']].append(model['model'].score(x_test, y_test))

```

```

for model, score in scores.items():
    print(f'Model: {model} \t Score: {np.mean(score):.2f} (+/-)
{np.std(score):.2f}')

```

## Regression

```

y_temp = StandardScaler().fit_transform(Y_clas.reshape(-1, 1))
X_regr = np.hstack((X_data, Y_clas.reshape(-1, 1)))
X_regr[:5]

```

```

Y_regr = sensor_data['Concentration'].values
Y_regr

```

```

array([ 1,  5, 10, 20, 50,  1,  5, 10, 20, 50,  1,  5, 10, 20, 50,  1,  5,
        10, 20, 50,  1,  5, 10, 20, 50,  1,  5, 10, 20, 50,  1,  5, 10, 20,
        50,  1,  5, 10, 20, 50,  1,  5, 10, 20, 50,  1,  5, 10, 20, 50,  1,
        5, 10, 20, 50,  1,  5, 10, 20, 50])

```

```

data = defaultdict(dict)
for class_n in range(6):
    idx = Y_clas == class_n
    data[class_n]['data'] = X_data[idx]
    data[class_n]['label'] = Y_regr[idx]
    data[class_n]['idx'] = idx

```

```

sensor_data.shape

```

```

(60, 8)

```

### Regression with class

```

for key, value in data.items():
    label = label_encoder.inverse_transform((key,))[0]
    print(f'{label}')
    r_sq = defaultdict(list)
    mse = defaultdict(list)

    # Stratified k-Fold keeps the proportions of the classes
    skf = StratifiedKFold(n_splits=2)
    for train_index, test_index in skf.split(value['data'], value['label']):
        x_train, x_test = value['data'][train_index], value['data'][test_index]
        y_train, y_test = value['label'][train_index], value['label'][test_index]

        models = [
            {"name": "Random Forest", "model": RandomForestRegressor(n_estimators=10,
random_state=10)},
            {"name": "SVR\t", "model": svm.LinearSVR(random_state=10)},

```

```

        {"name": "Ada Boost", "model": AdaBoostRegressor(random_state=10)},
        {"name": "Bagging (KNN)", "model": BaggingRegressor(KNeighborsRegressor(),
random_state=10)},
        {"name": "Extra trees", "model": ExtraTreesRegressor(n_estimators=10,
random_state=10)},
        {"name": "Decision trees", "model": DecisionTreeRegressor(random_state=10)},
        {"name": "MLP\t", "model": MLPRegressor((50, 100, 50), random_state=10)},
        {"name": "Lasso\t", "model": Lasso(random_state=10)}
    ]

    # Models are tested on the split and result is saved
    for model in models:
        # Train model
        model['model'].fit(x_train, y_train)

        # Save r^2 data
        r_sq[model["name"]].append(model['model'].score(x_test, y_test))

        # Save mse data
        y_pred = model['model'].predict(x_test)
        mse[model["name"]].append(mean_squared_error(y_test, y_pred))

    for model, score in r_sq.items():
        print(
            f'Model: {model} \t R^2: {np.mean(score):.2f} (+/-) {np.std(score):.2f}'
        \
            f' \t RMSE: {np.mean(np.sqrt(mse[model])):.2f} (+/-)
{np.std(np.sqrt(mse[model])):.2f}'
        )

    models = [
        {"name": "Random Forest", "model": RandomForestRegressor(n_estimators=10,
random_state=10)},
        {"name": "Extra trees", "model": ExtraTreesRegressor(n_estimators=10,
random_state=10)},
        {"name": "Ada Boost", "model": AdaBoostRegressor(random_state=10)},
        {"name": "Decision trees", "model": DecisionTreeRegressor(random_state=10)},
        {"name": "Decision trees", "model": DecisionTreeRegressor(random_state=10)},
        {"name": "Extra trees", "model": ExtraTreesRegressor(n_estimators=10,
random_state=10)},
    ]

    full_prediction = np.zeros(sensor_data.shape[0])

    plt.figure(figsize=(16, 24))
    for key, value in data.items():
        true_concentration = value['label']

```

```

estimated = np.zeros(shape=true_concentration.shape)

# Plotting predicted vs real concentration
skf = StratifiedKFold(n_splits=2)
for train_index, test_index in skf.split(value['data'], value['label']):
    x_train, x_test = value['data'][train_index], value['data'][test_index]
    y_train, y_test = value['label'][train_index], value['label'][test_index]

    model = models[key]

    # Train model
    model['model'].fit(x_train, y_train)

    # Get estimated data
    y_pred = model['model'].predict(x_test)
    estimated[test_index] = y_pred

label = label_encoder.inverse_transform((key,))[0]
full_prediction[value['idx']] = estimated

# Line 1:1
x = np.arange(51)
# Plot
plt.subplot(3, 2, key + 1)
plt.style.use('ggplot')
plt.scatter(true_concentration, estimated)
plt.plot(x, x, label='1:1 Line')
plt.title(f'{model["name"]} regression on {label}')
plt.ylabel('Estimated concentration [ppm]')
plt.xlabel('Real concentration [ppm]')
plt.legend()

sensor_data['Predicted concentration'] = full_prediction
plt.show()

sensor_data.to_csv('sensor_prediction.csv', index=False)

```

## Ensamble

```

true_concentration = Y_regr
estimated = np.zeros(shape=Y_regr.shape)

r_sq = defaultdict(list)
mse = defaultdict(list)

# Stratified k-Fold keeps the proportions of the classes
skf = StratifiedKFold(n_splits=10)

```



```

for train_index, test_index in skf.split(X_regr, Y_regr):
    x_train, x_test = X_regr[train_index], X_regr[test_index]
    y_train, y_test = Y_regr[train_index], Y_regr[test_index]

models = [
    {"name": "Ada Boost", "model": AdaBoostRegressor(random_state=10)},
    {"name": "Bagging (KNN)", "model": BaggingRegressor(KNeighborsRegressor(),
random_state=10)},
    {"name": "Extra trees", "model": ExtraTreesRegressor(n_estimators=10,
random_state=10)},
    {"name": "MLP\t", "model": MLPRegressor((50, 100, 50), random_state=10)}
]

ensemble_models = [
#     {"name": "Random Forest", "model": RandomForestRegressor(n_estimators=10,
random_state=10)},
#     {"name": "SVR\t", "model": svm.LinearSVR(random_state=10)},
#     {"name": "Ada Boost", "model": AdaBoostRegressor(random_state=10)},
#     {"name": "Bagging (KNN)", "model": BaggingRegressor(KNeighborsRegressor(),
random_state=10)},
#     {"name": "Extra trees", "model": ExtraTreesRegressor(n_estimators=10,
random_state=10)},
#     {"name": "Decision trees", "model": DecisionTreeRegressor(random_state=10)},
#     {"name": "MLP\t", "model": MLPRegressor((50, 50), random_state=10)},
    {"name": "Lasso\t", "model": Lasso(random_state=10)}
]

ensemble_train = {}
ensemble_test = {}

for model in models:
    # Train model
    model['model'].fit(x_train, y_train)

    ensemble_train[model['name']] = model['model'].predict(x_train)
    ensemble_test[model['name']] = model['model'].predict(x_test)

ensemble_train = pd.DataFrame(ensemble_train)
ensemble_test = pd.DataFrame(ensemble_test)

for ensemble_model in ensemble_models:
    ensemble_model['model'].fit(ensemble_train, y_train)

    # Save r^2 data
    r_sq[ensemble_model['name']].append(ensemble_model['model'].score(ensemble_test,
y_test))

    # Save mse data
    y_pred = ensemble_model['model'].predict(ensemble_test)

```

```

estimated[test_index] = y_pred
mse[ensemble_model['name']].append(mean_squared_error(y_test, y_pred))

for model, score in r_sq.items():
    print(
        f'Model: {model} \t R^2: {np.mean(score):.2f} (+/-) {np.std(score):.2f}' \
        f' \t RMSE: {np.mean(np.sqrt(mse[model])):.2f} (+/-) \
{np.std(np.sqrt(mse[model])):.2f}'
    )

plt.figure(figsize=(8, 8))
plt.style.use('ggplot')
plt.scatter(estimated, true_concentration)
plt.plot(x, x, label='1:1 Line')
plt.title('Ensamble regression')
plt.xlabel('Estimated concentration [ppm]')
plt.ylabel('Real concentration [ppm]')
plt.legend()
plt.show()

```

### Regression on UMAP with class

```

r_sq = defaultdict(list)
mse = defaultdict(list)

# Stratified k-Fold keeps the proportions of the classes
skf = StratifiedKFold(n_splits=10)
for train_index, test_index in skf.split(X_regr, Y_regr):
    # Embedding
    umap_obj = umap.UMAP(
        n_neighbors=5,
        min_dist=0.3,
        metric='correlation'
    )

    # Separate data
    x_train = umap_obj.fit_transform(X_regr[train_index])
    x_test = umap_obj.transform(X_regr[test_index])
    y_train, y_test = Y_regr[train_index], Y_regr[test_index]

    # Scale
    scaler = StandardScaler()
    x_train = scaler.fit_transform(x_train)
    x_test = scaler.transform(x_test)

    # Models
    models = [

```

```

        {"name": "Random Forest", "model": RandomForestRegressor(n_estimators=10,
random_state=10)},
        {"name": "SVR\t", "model": svm.LinearSVR(random_state=10)},
        {"name": "Ada Boost", "model": AdaBoostRegressor(random_state=10)},
        {"name": "Bagging (KNN)", "model": BaggingRegressor(KNeighborsRegressor(),
random_state=10)},
        {"name": "Extra trees", "model": ExtraTreesRegressor(n_estimators=10,
random_state=10)},
        {"name": "Decision trees", "model": DecisionTreeRegressor(random_state=10)},
        {"name": "MLP\t", "model": MLPRegressor(random_state=10)},
        {"name": "Lasso\t", "model": Lasso(random_state=10)}
    ]

    # Models are tested on the split and result is saved
    for model in models:
        # Train model
        model['model'].fit(x_train, y_train)

        # Save r^2 data
        r_sq[model["name"]].append(model['model'].score(x_test, y_test))

        # Save mse data
        y_pred = model['model'].predict(x_test)
        mse[model["name"]].append(mean_squared_error(y_test, y_pred))

    for model, score in r_sq.items():
        print(
            f'Model: {model} \t R^2: {np.mean(score):.4f} (+/-) {np.std(score):.2f}' \
            f' \t RMSE: {np.mean(np.sqrt(mse[model])):.2f} (+/-) \
            {np.std(np.sqrt(mse[model])):.2f}'
        )

```

## Regression without class

```

r_sq = defaultdict(list)
mse = defaultdict(list)

# Stratified k-Fold keeps the proportions of the classes
skf = StratifiedKFold(n_splits=10)
for train_index, test_index in skf.split(X_data, Y_regr):
    x_train, x_test = X_data[train_index], X_data[test_index]
    y_train, y_test = Y_regr[train_index], Y_regr[test_index]

    models = [
        {"name": "Random Forest", "model": RandomForestRegressor(n_estimators=10,
random_state=10)},
        {"name": "SVR\t", "model": svm.LinearSVR(random_state=10)},

```

```

        {"name": "Ada Boost", "model": AdaBoostRegressor(random_state=10)},
        {"name": "Bagging (KNN)", "model": BaggingRegressor(KNeighborsRegressor(),
random_state=10)},
        {"name": "Extra trees", "model": ExtraTreesRegressor(n_estimators=10,
random_state=10)},
        {"name": "Decision trees", "model": DecisionTreeRegressor(random_state=10)},
        {"name": "MLP\t", "model": MLPRegressor(random_state=10)},
    ]

    # Models are tested on the split and result is saved
    for model in models:
        # Train model
        model['model'].fit(x_train, y_train)

        # Save r^2 data
        r_sq[model["name"]].append(model['model'].score(x_test, y_test))

        # Save mse data
        y_pred = model['model'].predict(x_test)
        mse[model["name"]].append(mean_squared_error(y_test, y_pred))

    for model, score in r_sq.items():
        print(
            f'Model: {model} \t R^2: {np.mean(score):.2f} (+/-) {np.std(score):.2f}' \
            f' \t RMSE: {np.mean(np.sqrt(mse[model])):.2f} (+/-) \
{np.std(np.sqrt(mse[model])):.2f}'
        )

```

### Regression on UMAP without class

```

r_sq = defaultdict(list)
mse = defaultdict(list)

# Stratified k-Fold keeps the proportions of the classes
skf = StratifiedKFold(n_splits=10)
for train_index, test_index in skf.split(X_data, Y_regr):

    # Embedding
    umap_obj = umap.UMAP(
        n_neighbors=5,
        min_dist=0.3,
        metric='correlation'
    )

    # Separate data
    x_train = umap_obj.fit_transform(X_data[train_index])
    x_test = umap_obj.transform(X_data[test_index])
    y_train, y_test = Y_regr[train_index], Y_regr[test_index]

```

```

# Scale
scaler = StandardScaler()
x_train = scaler.fit_transform(x_train)
x_test = scaler.transform(x_test)

# Models
models = [
    {"name": "Random Forest", "model": RandomForestRegressor(n_estimators=10,
random_state=10)},
    {"name": "SVR\t", "model": svm.LinearSVR(random_state=10)},
    {"name": "Ada Boost", "model": AdaBoostRegressor(random_state=10)},
    {"name": "Bagging (KNN)", "model": BaggingRegressor(KNeighborsRegressor(),
random_state=10)},
    {"name": "Extra trees", "model": ExtraTreesRegressor(n_estimators=10,
random_state=10)},
    {"name": "Decision trees", "model": DecisionTreeRegressor(random_state=10)},
    {"name": "MLP\t", "model": MLPRegressor(random_state=10)},
]

# Models are tested on the split and result is saved
for model in models:
    # Train model
    model['model'].fit(x_train, y_train)

    # Save r^2 data
    r_sq[model["name"]].append(model['model'].score(x_test, y_test))

    # Save mse data
    y_pred = model['model'].predict(x_test)
    mse[model["name"]].append(mean_squared_error(y_test, y_pred))

for model, score in r_sq.items():
    print(
        f'Model: {model} \t R^2: {np.mean(score):.4f} (+/-) {np.std(score):.2f}' \
        f' \t RMSE: {np.mean(np.sqrt(mse[model])):.2f} (+/-) \
{np.std(np.sqrt(mse[model])):.2f}'
    )

```

### Regression with class on UMAP concatenated with data

```

nsr_sq = defaultdict(list)
mse = defaultdict(list)

# Stratified k-Fold keeps the proportions of the classes
skf = StratifiedKFold(n_splits=10)
for train_index, test_index in skf.split(X_regr, Y_regr):

```

```

# Embedding
umap_obj = umap.UMAP(
    n_neighbors=5,
    min_dist=0.3,
    metric='correlation'
)

# Separate data
x_train = umap_obj.fit_transform(X_regr[train_index])
x_test = umap_obj.transform(X_regr[test_index])
y_train, y_test = Y_regr[train_index], Y_regr[test_index]

# Append data
x_train = np.hstack((X_regr[train_index], x_train))
x_test = np.hstack((X_regr[test_index], x_test))

# Scale
scaler = StandardScaler()
x_train = scaler.fit_transform(x_train)
x_test = scaler.transform(x_test)

# Models
models = [
    {"name": "Random Forest", "model": RandomForestRegressor(n_estimators=10,
random_state=10)},
    {"name": "SVR\t", "model": svm.LinearSVR(random_state=10)},
    {"name": "Ada Boost", "model": AdaBoostRegressor(random_state=10)},
    {"name": "Bagging (KNN)", "model": BaggingRegressor(KNeighborsRegressor(),
random_state=10)},
    {"name": "Extra trees", "model": ExtraTreesRegressor(n_estimators=10,
random_state=10)},
    {"name": "Decision trees", "model": DecisionTreeRegressor(random_state=10)},
    {"name": "MLP\t", "model": MLPRegressor(random_state=10)},
    {"name": "Lasso\t", "model": Lasso(random_state=10)}
]

# Models are tested on the split and result is saved
for model in models:
    # Train model
    model['model'].fit(x_train, y_train)

    # Save r^2 data
    r_sq[model["name"]].append(model['model'].score(x_test, y_test))

    # Save mse data
    y_pred = model['model'].predict(x_test)
    mse[model["name"]].append(mean_squared_error(y_test, y_pred))

```

```
for model, score in r_sq.items():
    print(
        f'Model: {model} \t R^2: {np.mean(score):.4f} (+/-) {np.std(score):.2f}' \
        f' \t RMSE: {np.mean(np.sqrt(mse[model])):.2f} (+/-) \
{np.std(np.sqrt(mse[model])):.2f}'
    )
```
